# Supplementary material for: New Sequencing technologies help revealing unexpected mutations in Autosomal Dominant Hypercholesterolemia
Source: PubMed Central journal article supplement (PMC5792649; doi:10.1038/s41598-018-20281-9), 2018-01-31
Supplement: 41598_2018_20281_MOESM1_ESM.pdf [file 41598_2018_20281_MOESM1_ESM.pdf]

# **New Sequencing technologies help revealing unexpected mutations in Autosomal Dominant Hypercholesterolemia**

Sandy Elbitar <sup>1,2,3</sup>, Delia Susan-Resiga<sup>4</sup>, Youmna Ghaleb <sup>1,2,3</sup>, Petra El Khoury <sup>1,2</sup>, Gina Peloso<sup>5</sup>, Nathan Stitzziel<sup>6</sup>, Jean-Pierre Rabès <sup>1,7</sup>, Valérie Carreau<sup>8</sup>, Josée Hamelin<sup>4</sup>, Ali Ben- Djoudi-Ouadda<sup>4</sup>, Eric Bruckert<sup>8</sup>, Catherine Boileau<sup>1,3,9</sup>, Nabil G. Seidah<sup>4</sup>, Mathilde Varret <sup>1,3</sup>, Marianne Abifadel\* <sup>1,2</sup>

**Figure 2A**

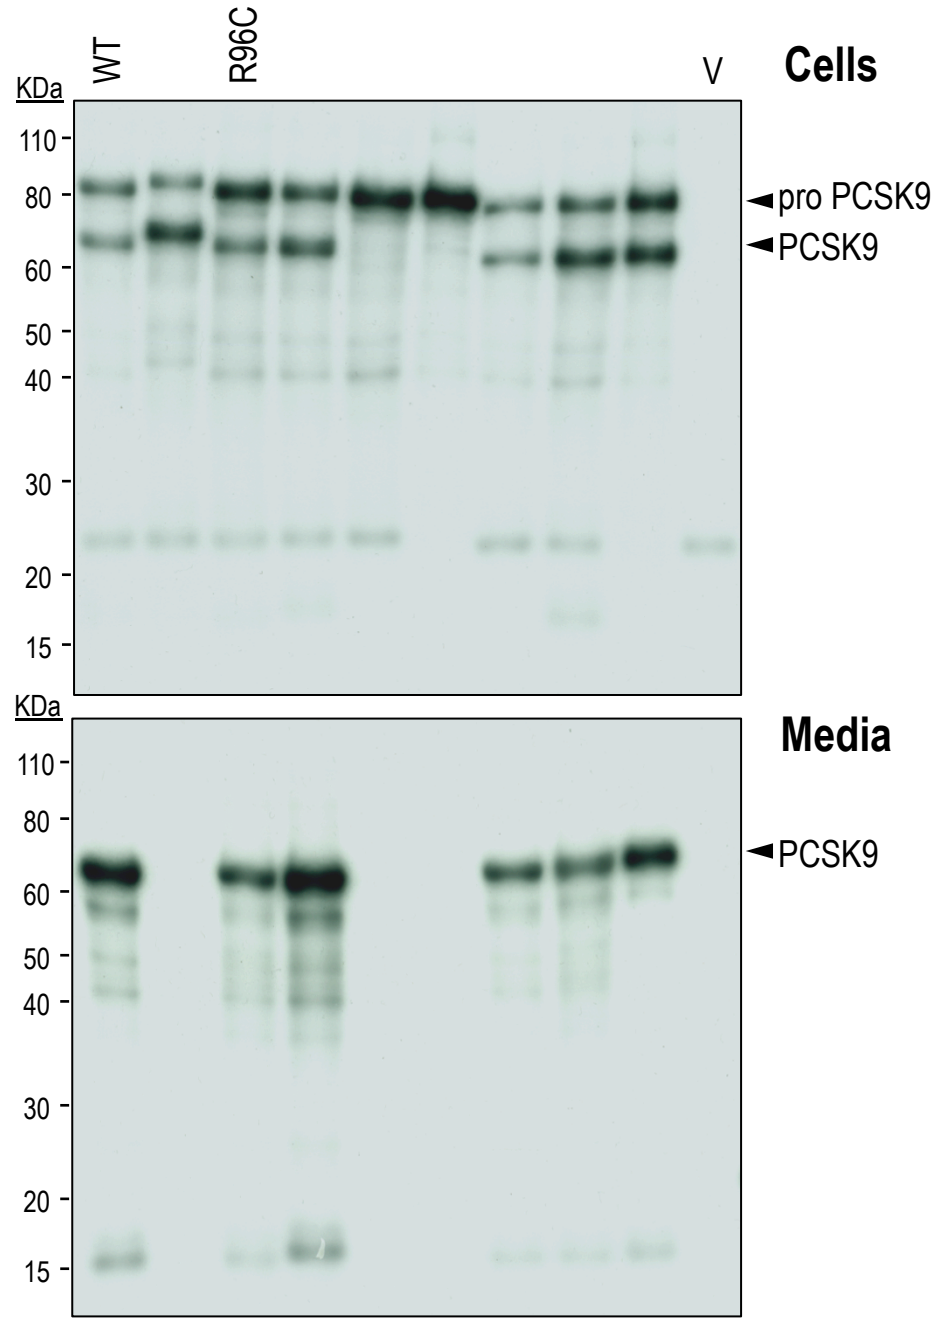

Figure 2B

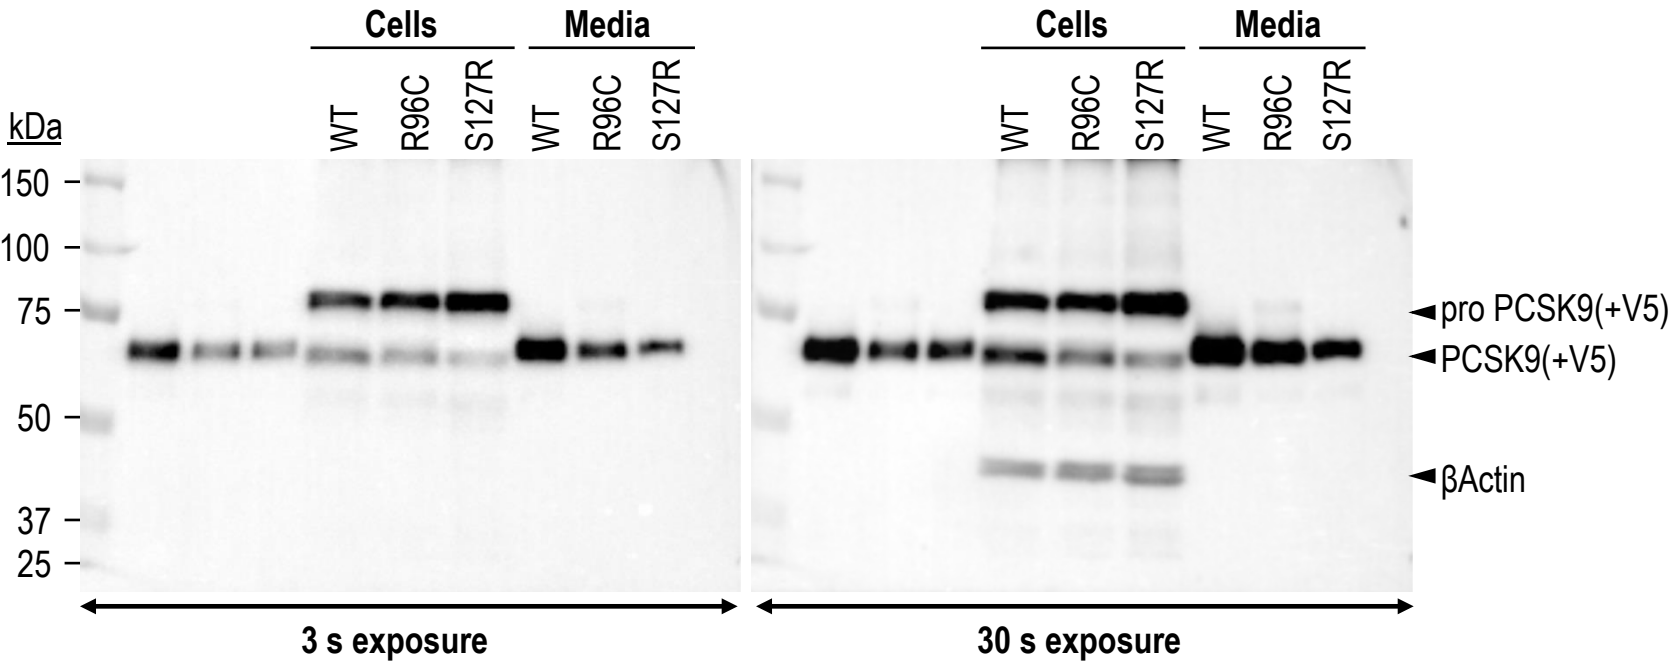

Figure 2D

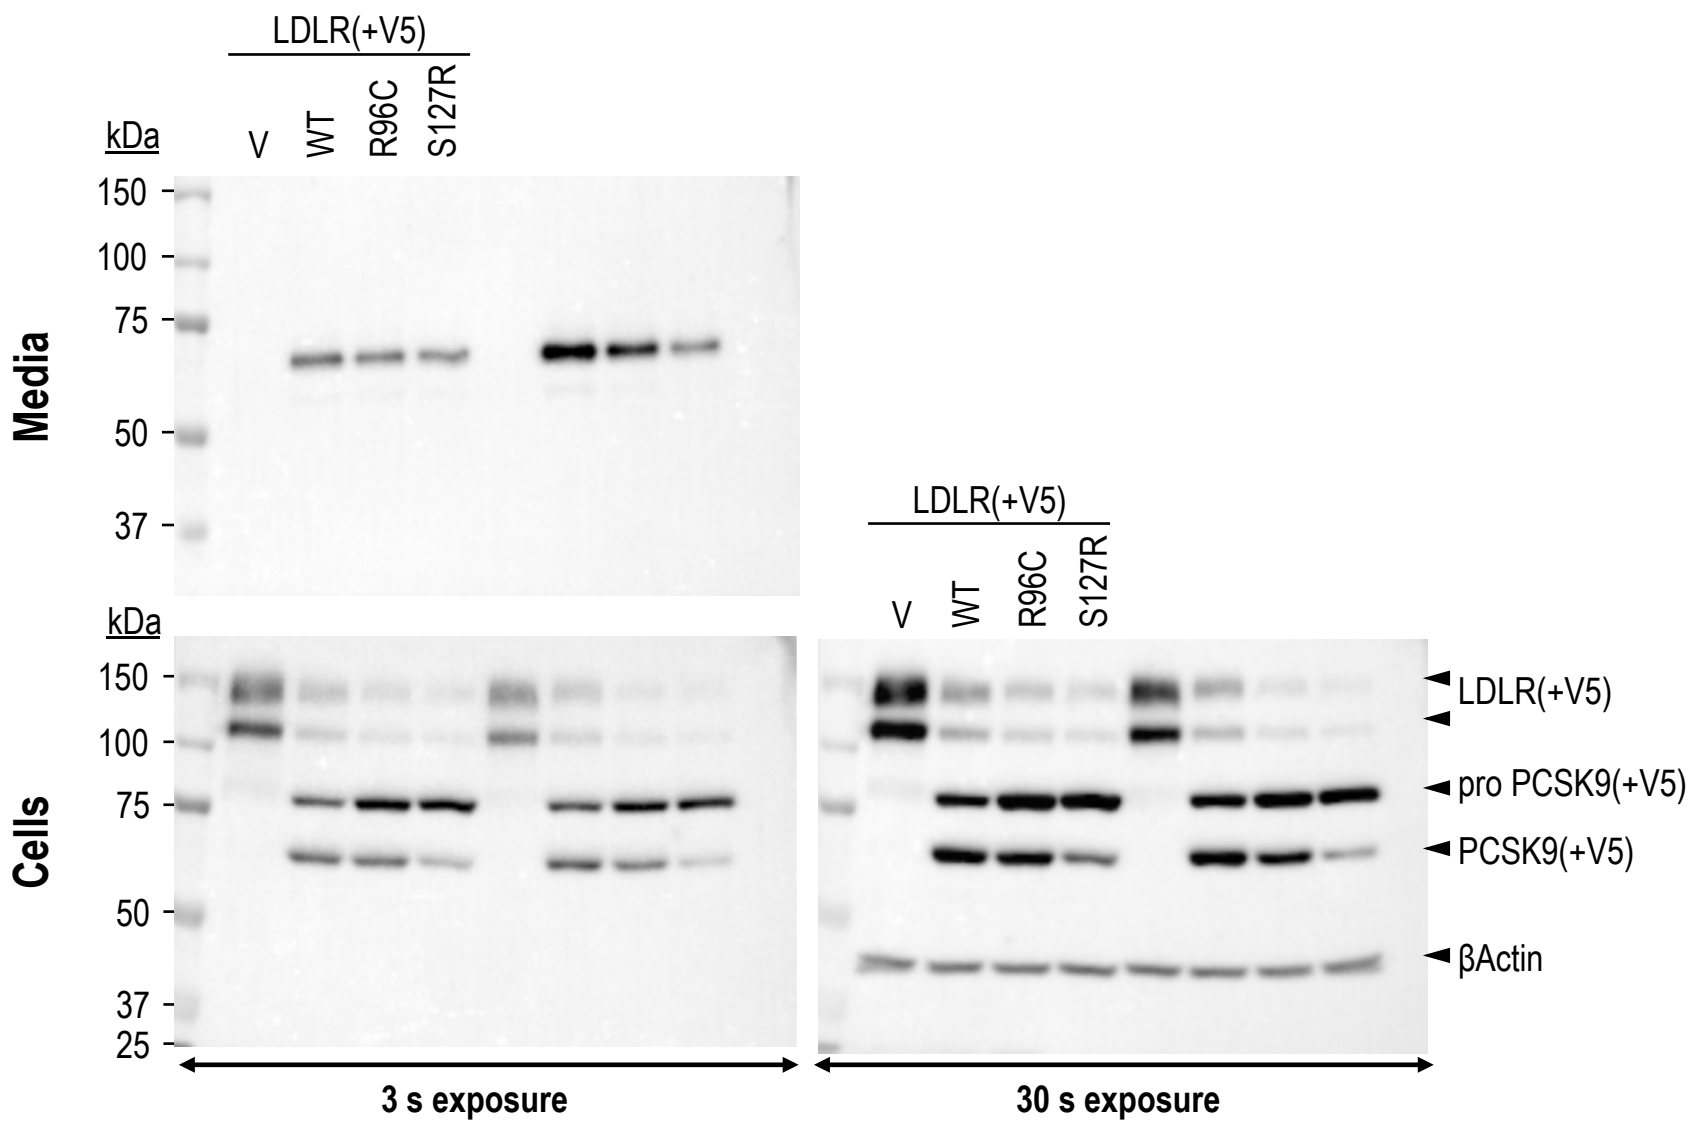

Supplementary Figure 2: Full-length blots of Figures 2A, 2B and 2D. Only the lanes selected in Figure 2 are labeled. 2A represents the biosynthetic analysis: 48h post-transfection cells were pulsed-labeled with [<sup>35</sup>S]Met/Cys for 3h, followed by anti-V5 immunoprecipitation, SDS-PAGE and autoradiography. 2B represents WB analysis using anti V5-HRP and anti-β-Actin. The bands corresponding to proPCSK9 and PCSK9 in cells and media were quantified and their values normalized to β-Actin. In 2D, transfected HEK293 cells were analyzed by WB using anti V5-HRP after that V5-tagged LDLR was co-transfected with V5-tagged PCSK9-WT, PCSK9-R96C, PCSK9-S127R or empty vector as control and their values normalized to β-Actin.
